# Supplementary material for: Soil moisture and streamflow deficit anomaly index: An approach to quantify drought hazards by combining deficit and anomaly
Source: Copernicus journal article supplement (doi:10.5194/nhess-2020-265), 2020-08-19
Supplement: Supplementary file [file nhess-2020-265-AC3-supplement.pdf]

**Additional changes:**

While working on the valuable referee comments and also by direct feedback from readers of the discussion paper, we further modified the manuscript as follows:

- Added a new section on data availability
- Added interpretation of highly intermittent streamflow regimes with QDAI
